# Supplementary material for: Quinoxaline-functionalized C60 derivatives as electron acceptors in organic solar cells
Source: Royal Society of Chemistry journal article supplement (doi:10.1039/c4ra02911a), 2014-01-01

# Quinoxaline-functionlized C<sub>60</sub> derivatives as electron acceptors in organic solar cells

Wangqiao Chen,<sup>a,b</sup> Teddy Salim,<sup>b</sup> Haijun Fan,<sup>a</sup> Yeng Ming Lam<sup>\*a</sup> and Qichun Zhang<sup>\*a, b</sup>

<sup>a</sup> School of Materials Science and Engineering, Nanyang Technological University, 50 Nanyang Avenue, Singapore 639798. Email: [qc Zhang@ntu.edu.sg](mailto:qc Zhang@ntu.edu.sg)

<sup>b</sup> Institute for Sports Research, Nanyang Technological University, 50 Nanyang Avenue, Singapore 639798

## Contents:

|                                     |          |
|-------------------------------------|----------|
| <b>1. Fig. S1.....</b>              | <b>2</b> |
| <b>2. Fig. S2.....</b>              | <b>3</b> |
| <b>3. Fig. S3.....</b>              | <b>4</b> |
| <b>4. Fig. S4.....</b>              | <b>5</b> |
| <b>5. Fig. S5.....</b>              | <b>6</b> |
| <b>6. Fig. S6.....</b>              | <b>7</b> |
| <b>7. NMR and HRMS spectra.....</b> | <b>8</b> |

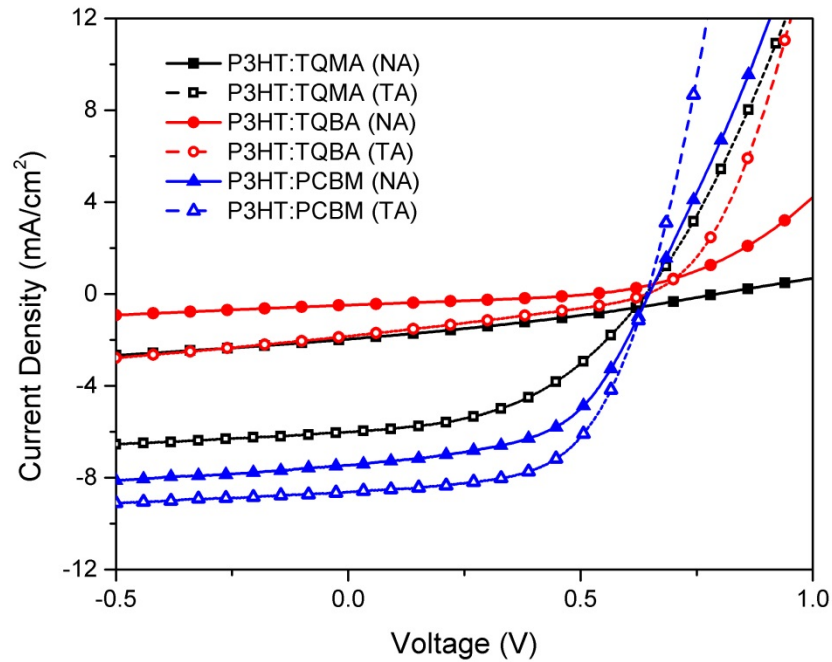

**Fig. S1**  $J$ - $V$  characteristics of as-cast (NA) and thermally annealed (TA) P3HT BHJ-OSCs devices with various acceptors under AM 1.5G ( $100 \text{ mW cm}^{-2}$ ) illumination. The device configuration is ITO/PEDOT:PSS/BHJ/Al.

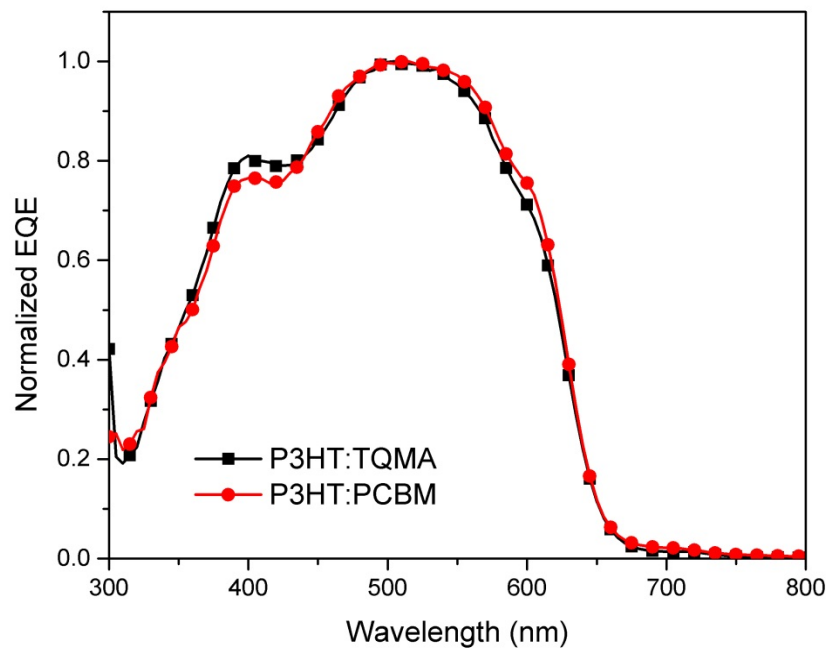

**Fig. S2** EQE spectra of P3HT:TQMA and P3HT:PCBM BHJ-OSCs devices. Both spectra are normalized to their respective  $\text{EQE}_{\text{max}}$ .

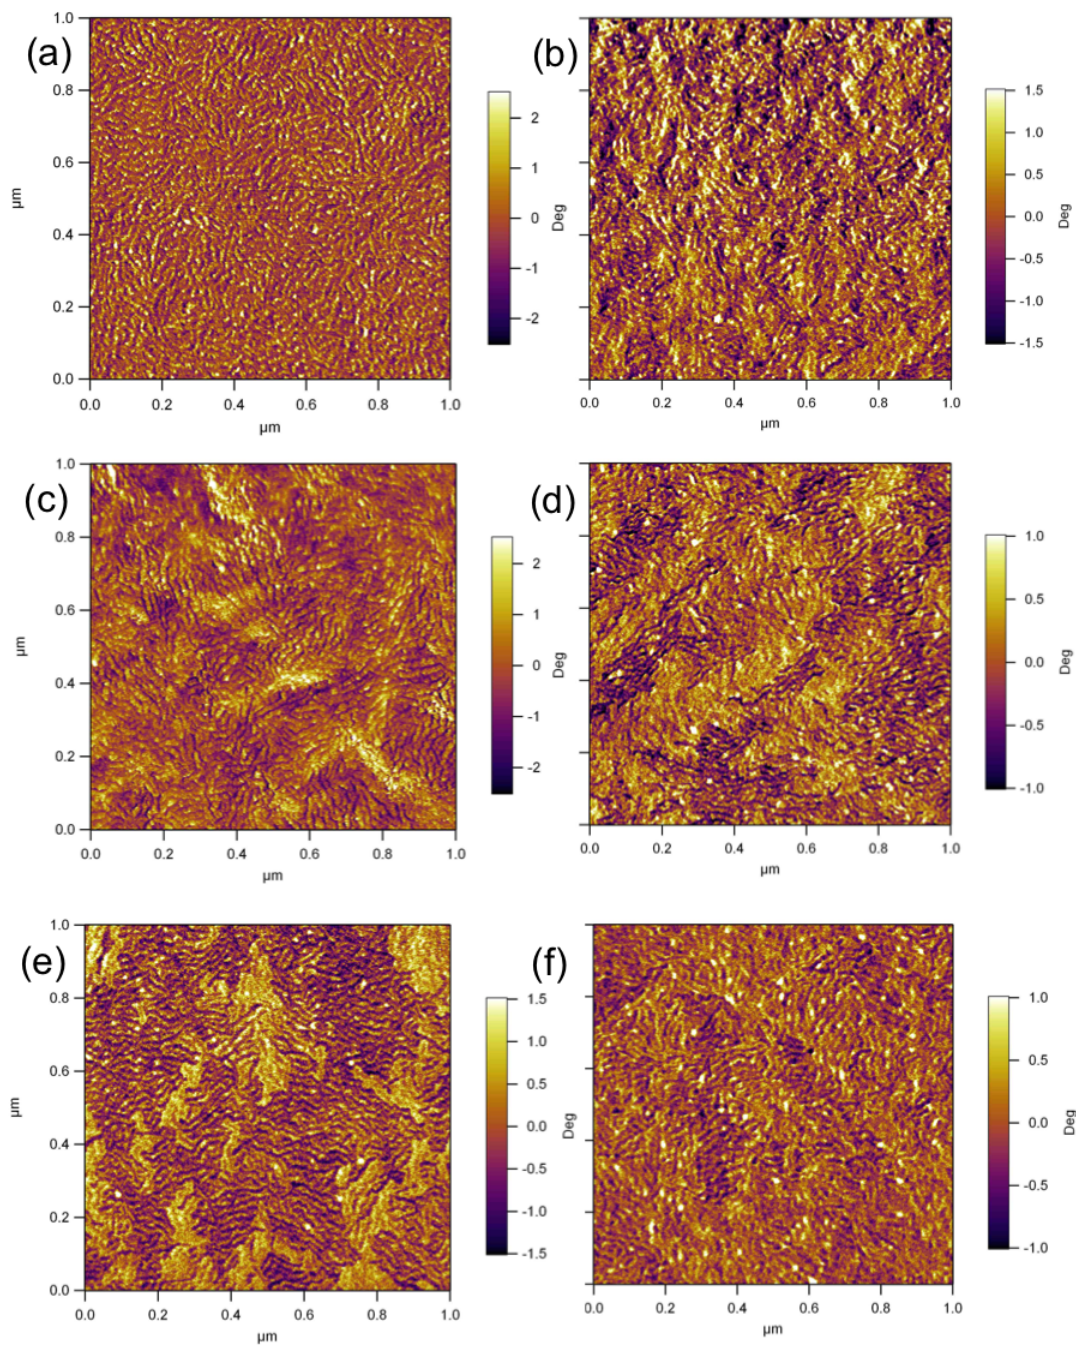

**Fig. S3.** Tapping-mode AFM phase images of (a,b) P3HT:TQMA, (c,d) P3HT:TQBA and (e,f) P3HT:PC<sub>61</sub>BM. The left images are those of the as-cast (NA) blends, while the right ones correspond to the thermally-annealed (TA) blends. The scan size is  $1 \times 1 \mu\text{m}^2$ .

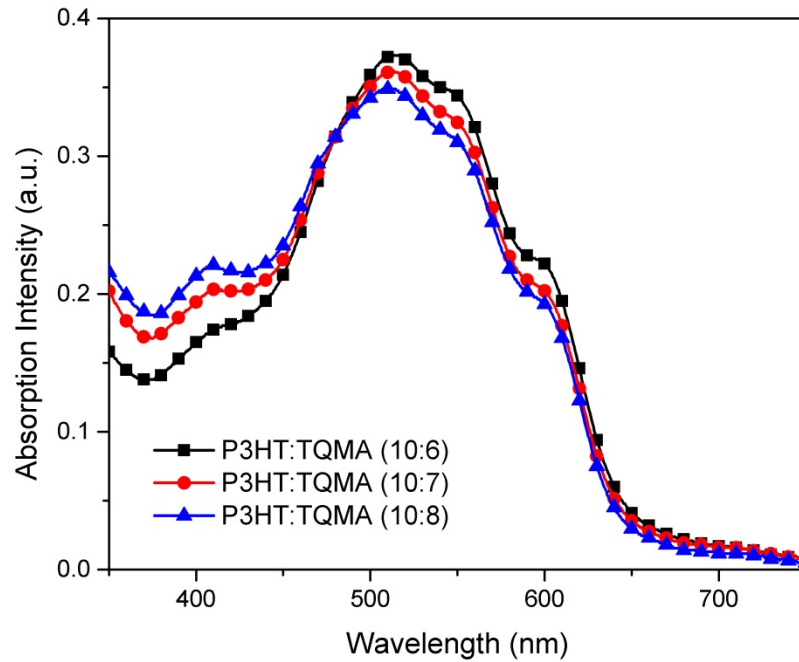

**Fig. S4.** UV-Vis absorption spectra of thermally annealed P3HT:TQMA blend films with different D:A ratios.

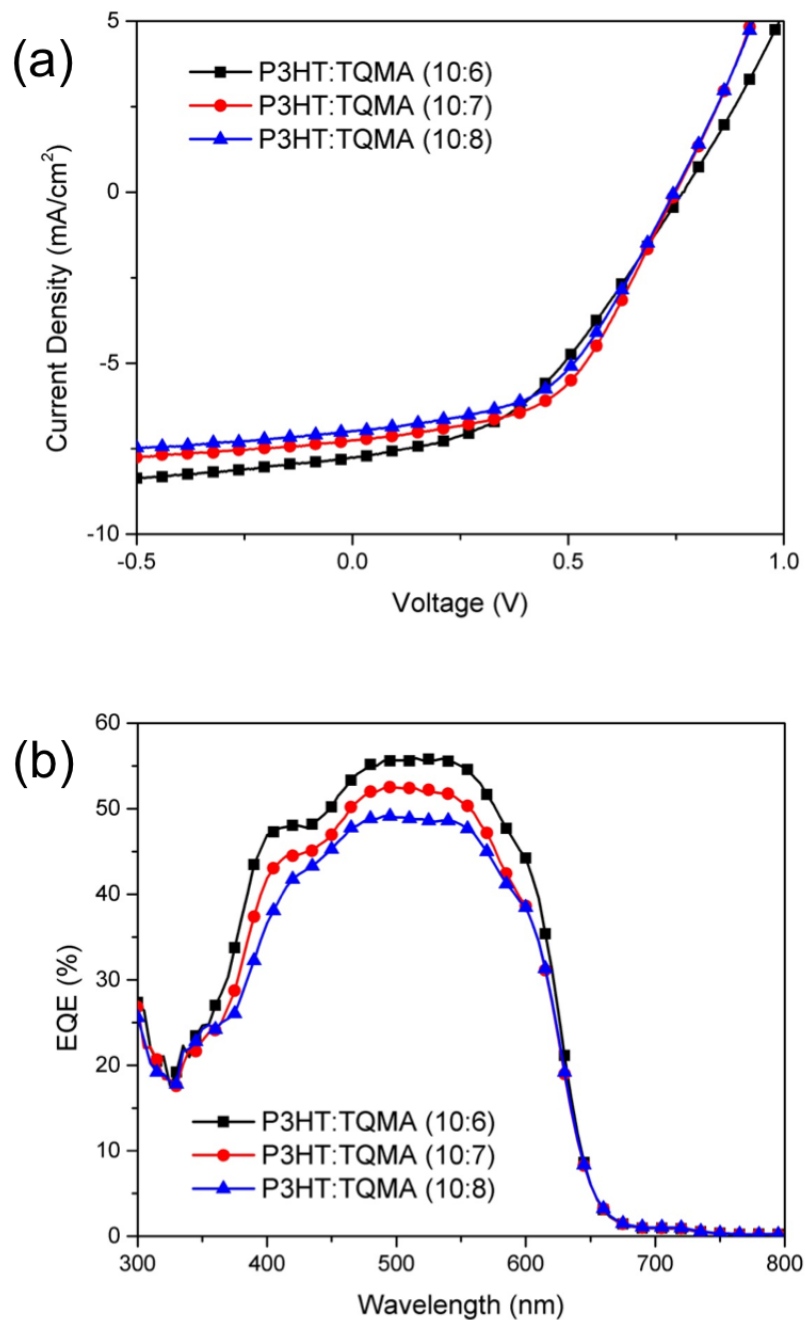

**Fig. S5** (a)  $J-V$  characteristics and (b) EQE spectra of P3HT:TQMA BHJ-OSCs devices with different D:A ratios. The device configuration is ITO/PEDOT:PSS/BHJ/TiO<sub>x</sub>/Al. The  $J-V$  characteristics were measured under AM 1.5G (100  $\text{mW cm}^{-2}$ ) illumination.

**Fig. S6** Tapping-mode AFM height images of P3HT:TQMA with different D:A ratios: (a) 10:6, (b) 10:7 and (c) 10:8. The scan size is  $1 \times 1 \mu\text{m}^2$ .

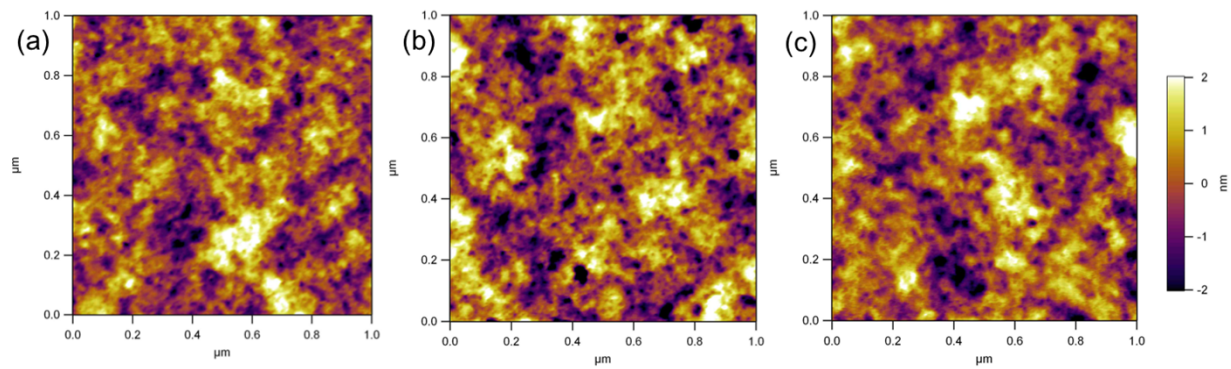

## 7. NMR and HRMS spectra for the compounds

**2-*tert*-butylthiophene(R1):** Synthesized according to the literature, colorless liquid. <sup>1</sup>H NMR (300 MHz, CDCl<sub>3</sub>) δ: 7.14–7.12 (m, 1H), 6.94–6.92 (m, 1H), 6.86–6.84 (m, 1H), 1.39 (s, 9H).

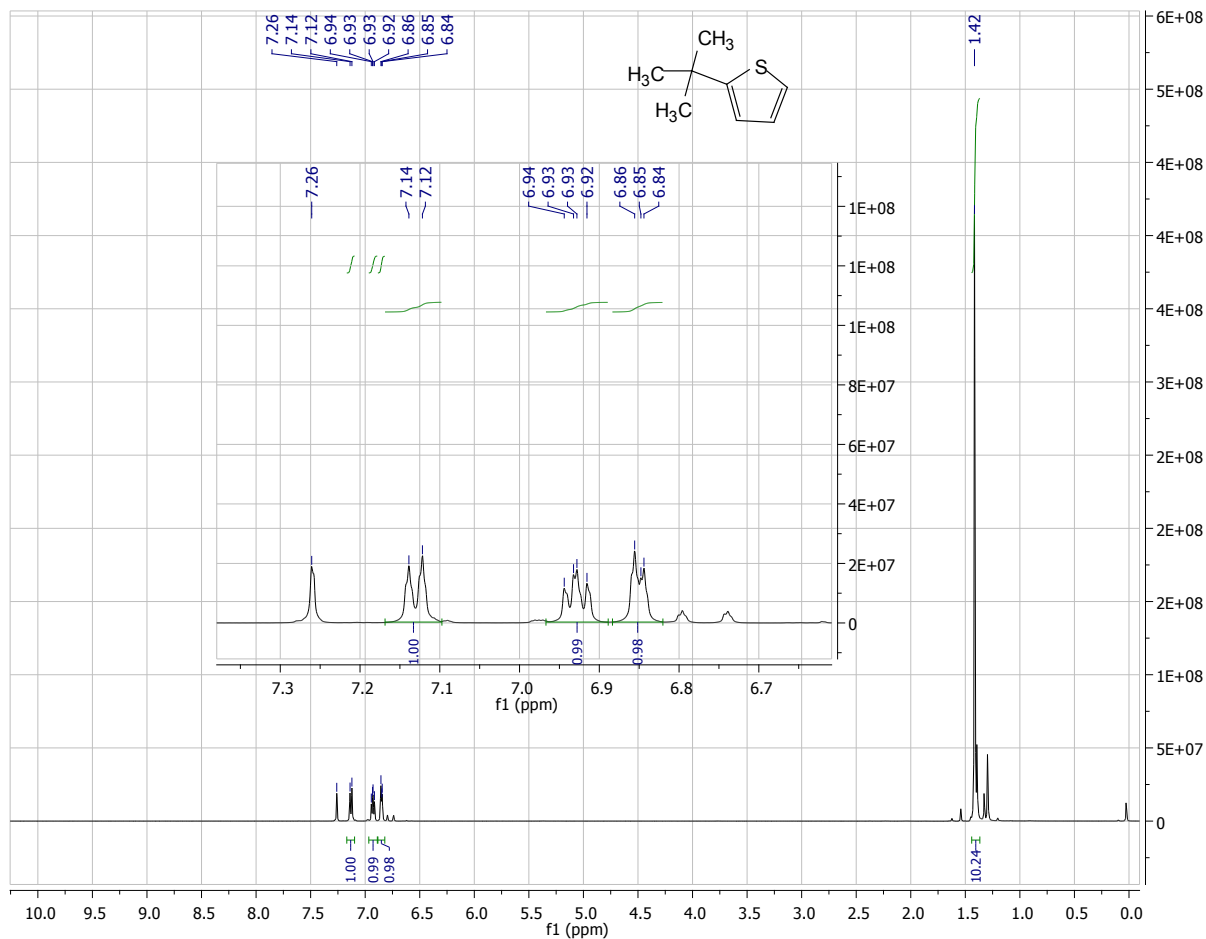

## 1,2-bis(5-*tert*-butylthiophen-2-yl)ethane-1,2-dione(R2):

| Mass     | Calc. Mass | mDa | PPM | DBE | i-FIT | i-FIT (Norm) | Formula                                                       |
|----------|------------|-----|-----|-----|-------|--------------|---------------------------------------------------------------|
| 335.1143 | 335.1139   | 0.4 | 1.2 | 7.5 | 22.2  | 0.0          | C <sub>18</sub> H <sub>23</sub> O <sub>2</sub> S <sub>2</sub> |



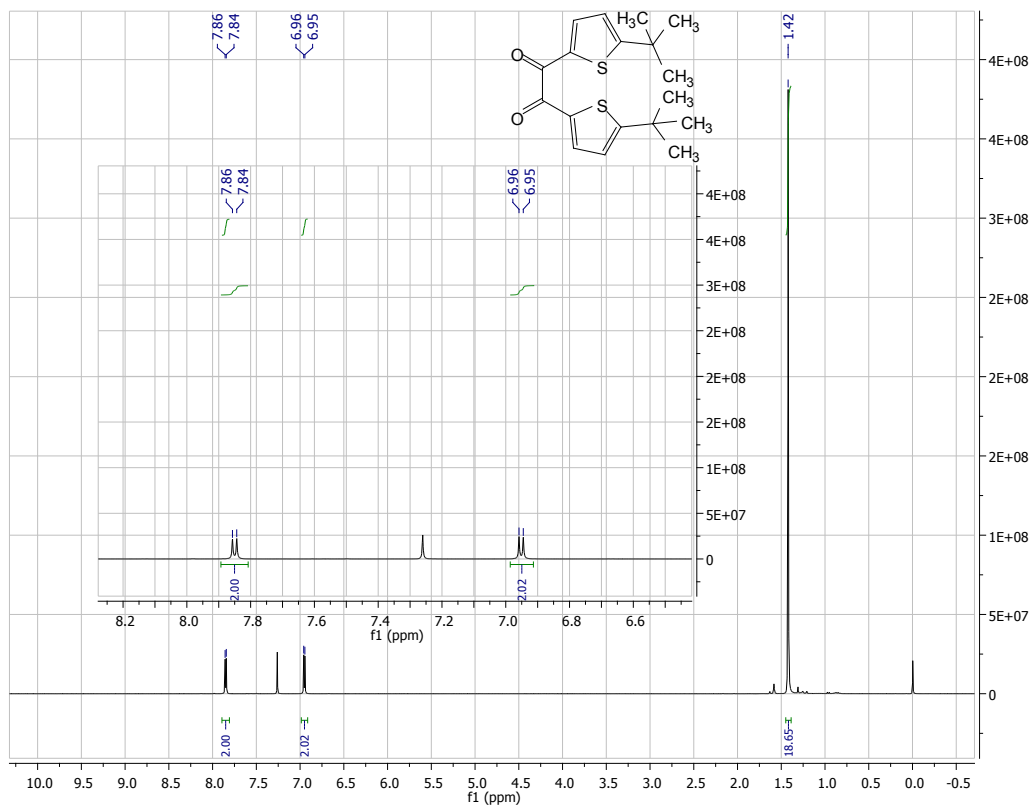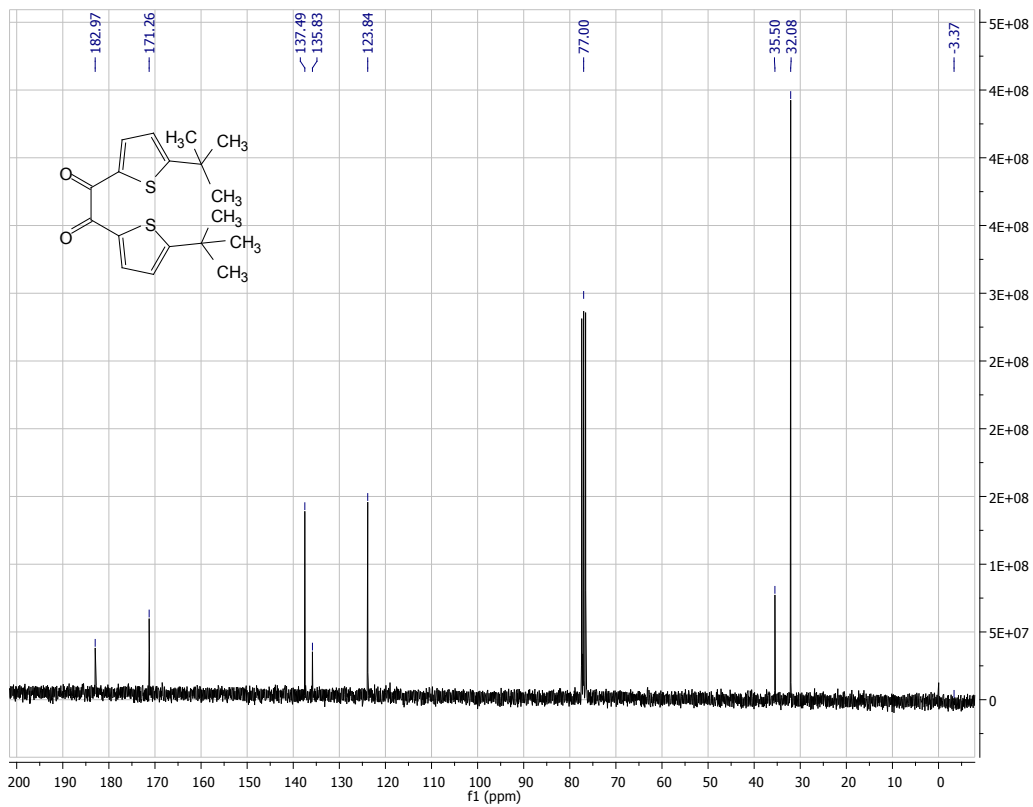

## 2,3-bis(5-*tert*-butylthiophen-2-yl)-6,7-dimethylquinoxaline(R3):

| Mass     | Calc. Mass | mDa  | PPM  | DBE  | i-FIT | i-FIT (Norm) | Formula                                                       |
|----------|------------|------|------|------|-------|--------------|---------------------------------------------------------------|
| 435.1919 | 435.1929   | -1.0 | -2.3 | 12.5 | 29.4  | 0.0          | C <sub>26</sub> H <sub>31</sub> N <sub>2</sub> S <sub>2</sub> |

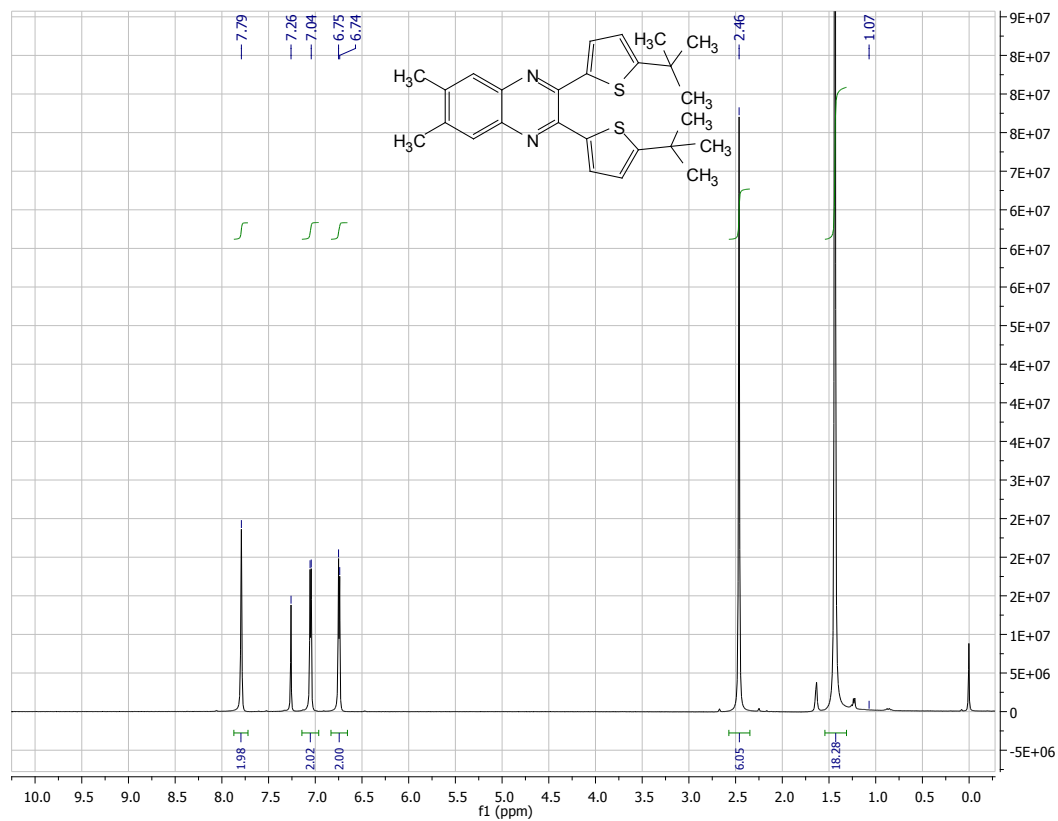

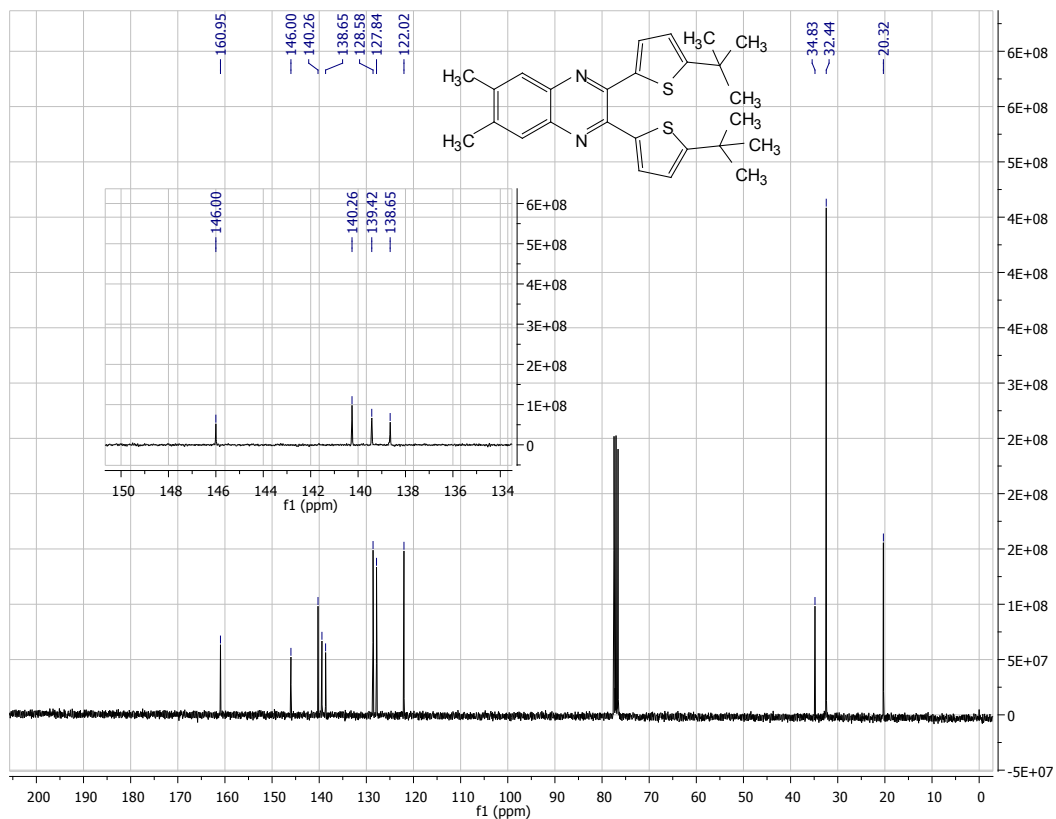

**6,7-bis(bromomethyl)-2,3-bis(5-tert-butylthiophen-2-yl)quinoxaline(R4):**

| Mass     | Calc. Mass | mDa   | PPM   | DBE  | i-FIT | i-FIT (Norm) | Formula                 |
|----------|------------|-------|-------|------|-------|--------------|-------------------------|
| 592.9991 | 593.0118   | -12.7 | -21.4 | 12.5 | 10.9  | 0.0          | C26 H29 N2 S2 79Br 81Br |

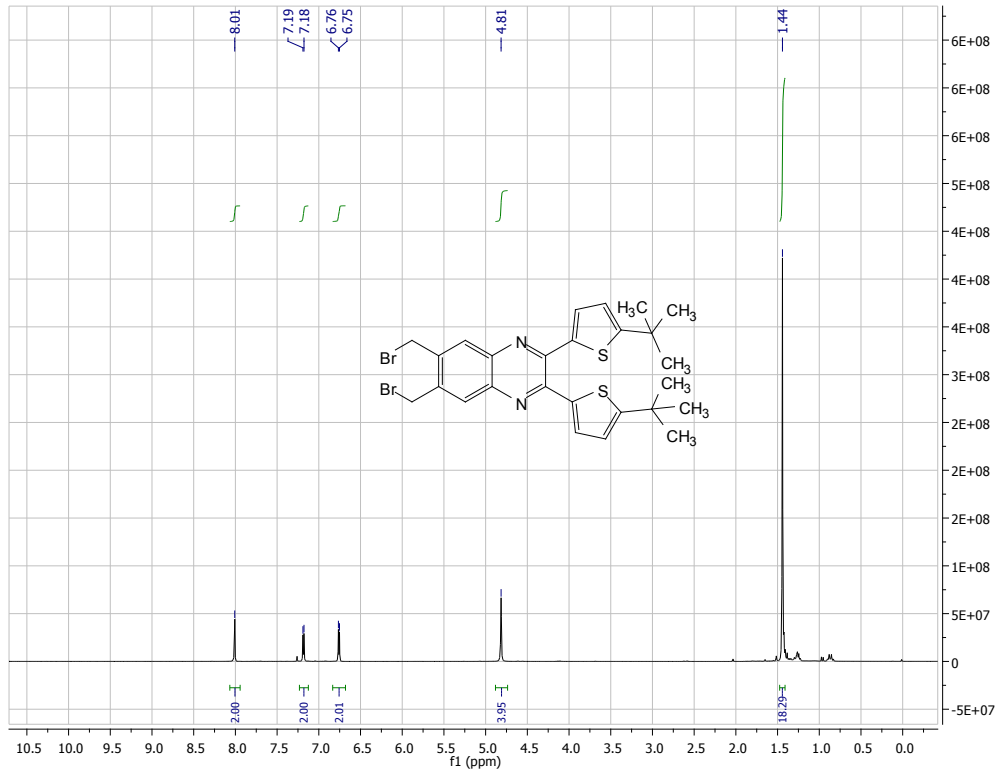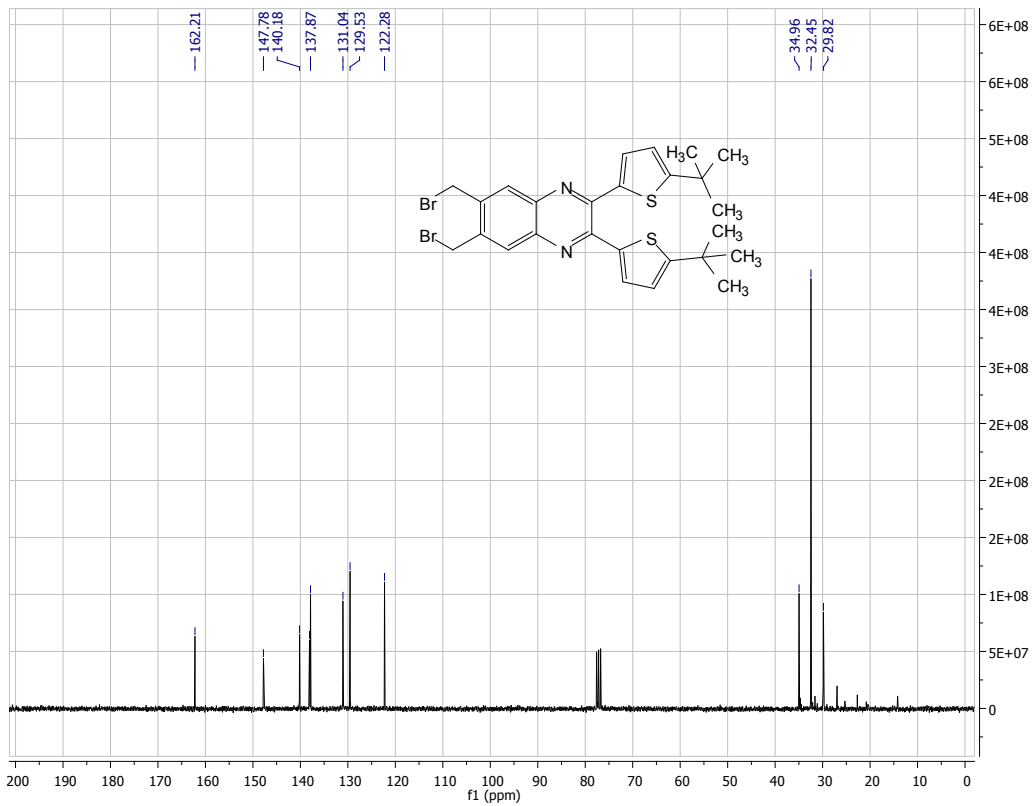

TQMA:

|           |            |       |       |       |       |              |               |  |
|-----------|------------|-------|-------|-------|-------|--------------|---------------|--|
| Minimum:  |            |       |       | -1.5  |       |              |               |  |
| Maximum:  |            | 5.0   | 200.0 | 100.0 |       |              |               |  |
| Mass      | Calc. Mass | mDa   | PPM   | DBE   | i-FIT | i-FIT (Norm) | Formula       |  |
| 1153.0865 | 1153.1772  | -90.7 | -78.7 | 73.5  | 11.5  | 0.0          | C86 H29 N2 S2 |  |

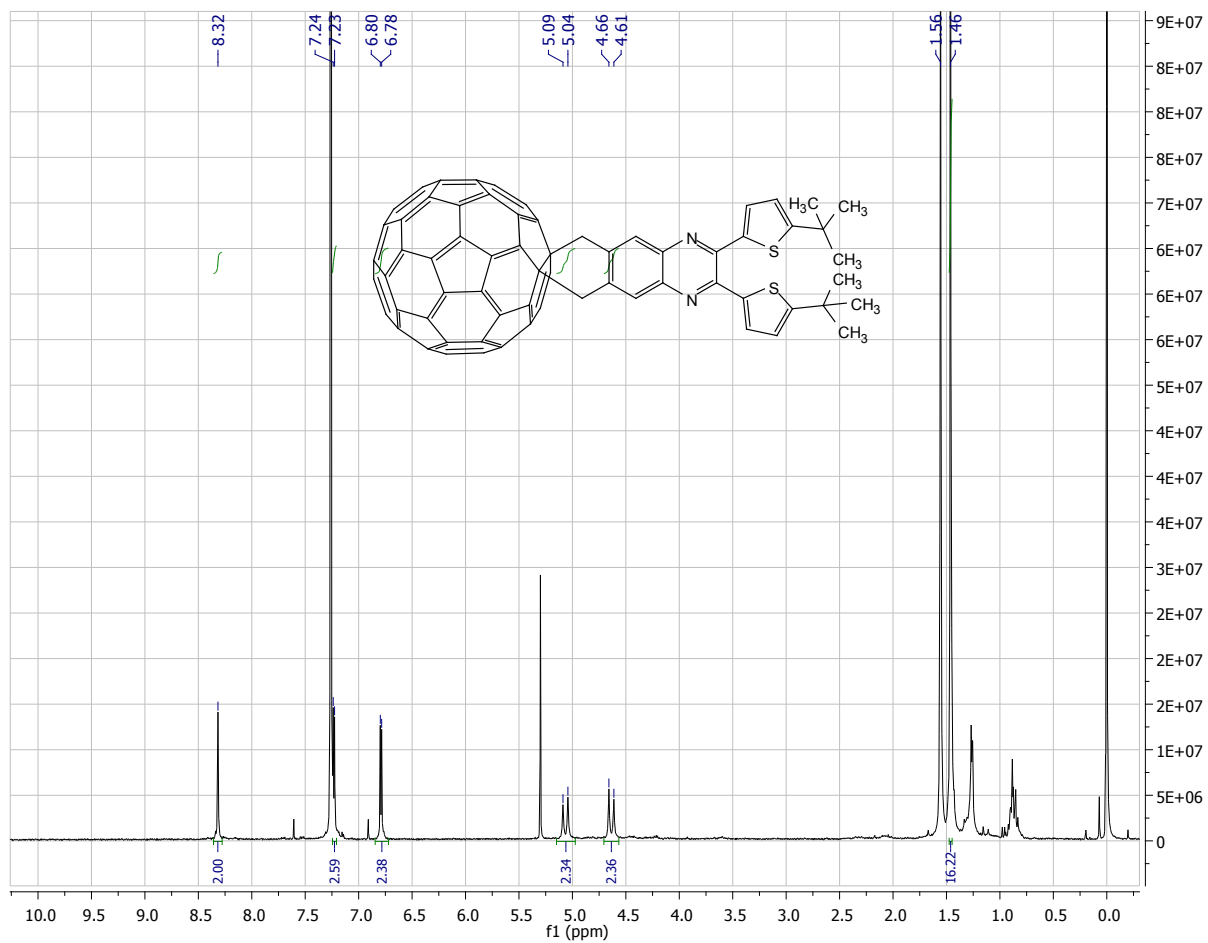

**TQBA:**

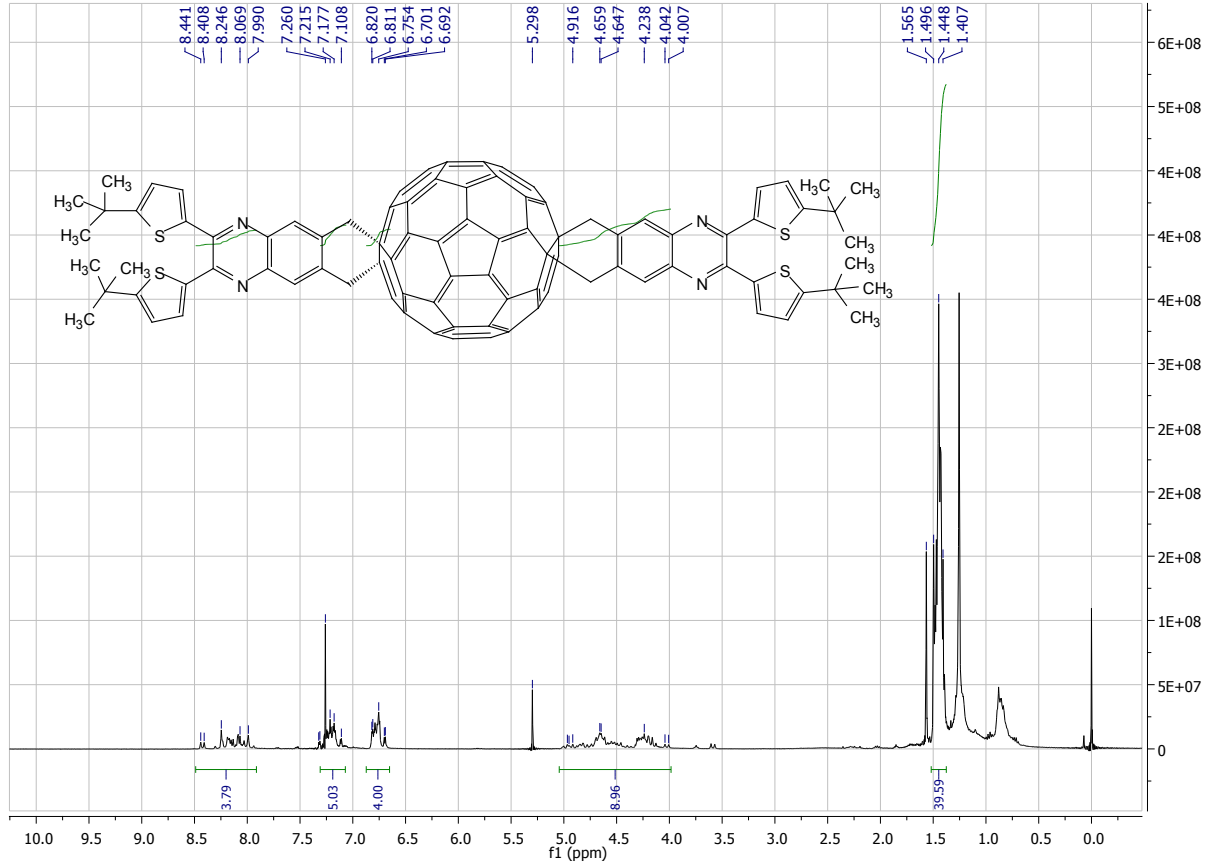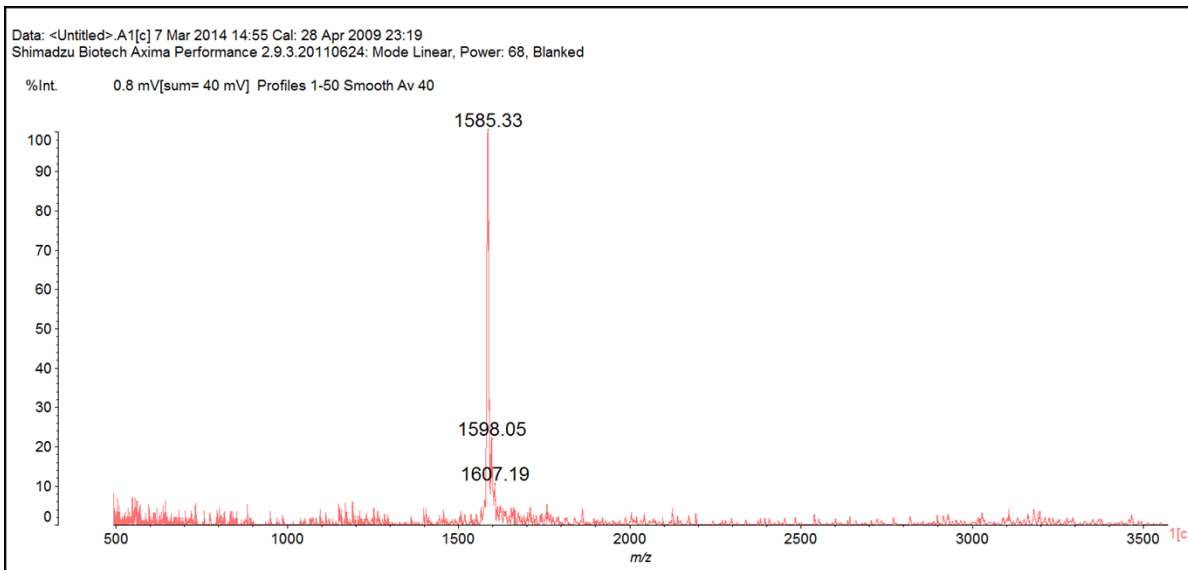

Data: <Untitled> A2[c] 7 Mar 2014 15:05 Cal: 28 Apr 2009 23:19  
Shimadzu Biotech Axima Performance 2.9.3.20110624: Mode Linear\_neg, Power: 75, Blanked

%Int. 111 mV[sum= 5564 mV] Profiles 1-50 Smooth Av 40

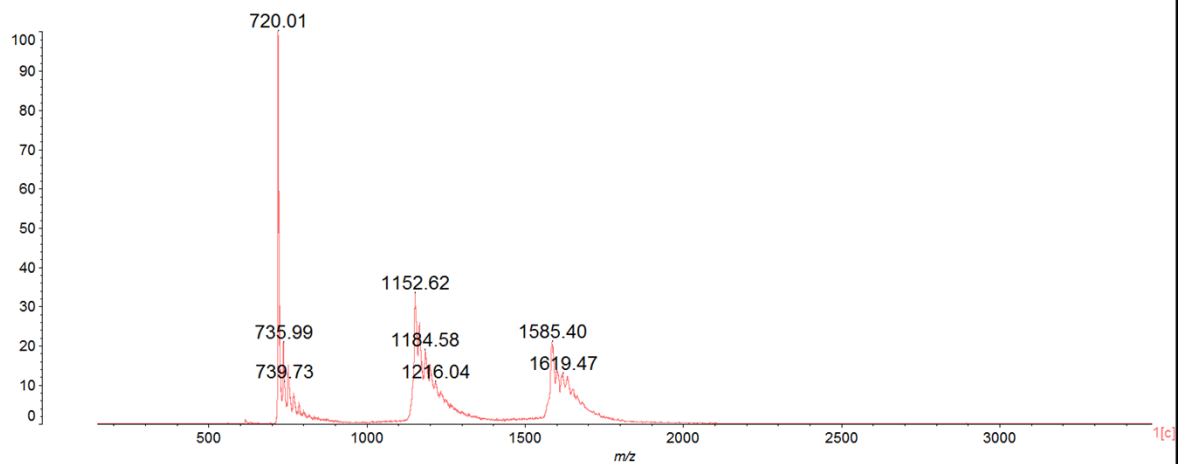

Supplement: c4ra02911a1.pdf [file c4ra02911a1.pdf]
